# Supplementary material for: Anticancer and Immunomodulatory Activities of a Novel Water-Soluble Derivative of Ellipticine
Source: MDPI journal article supplement (doi:10.3390/molecules25092130), 2020-05-01
Supplement: s1 [file s1]

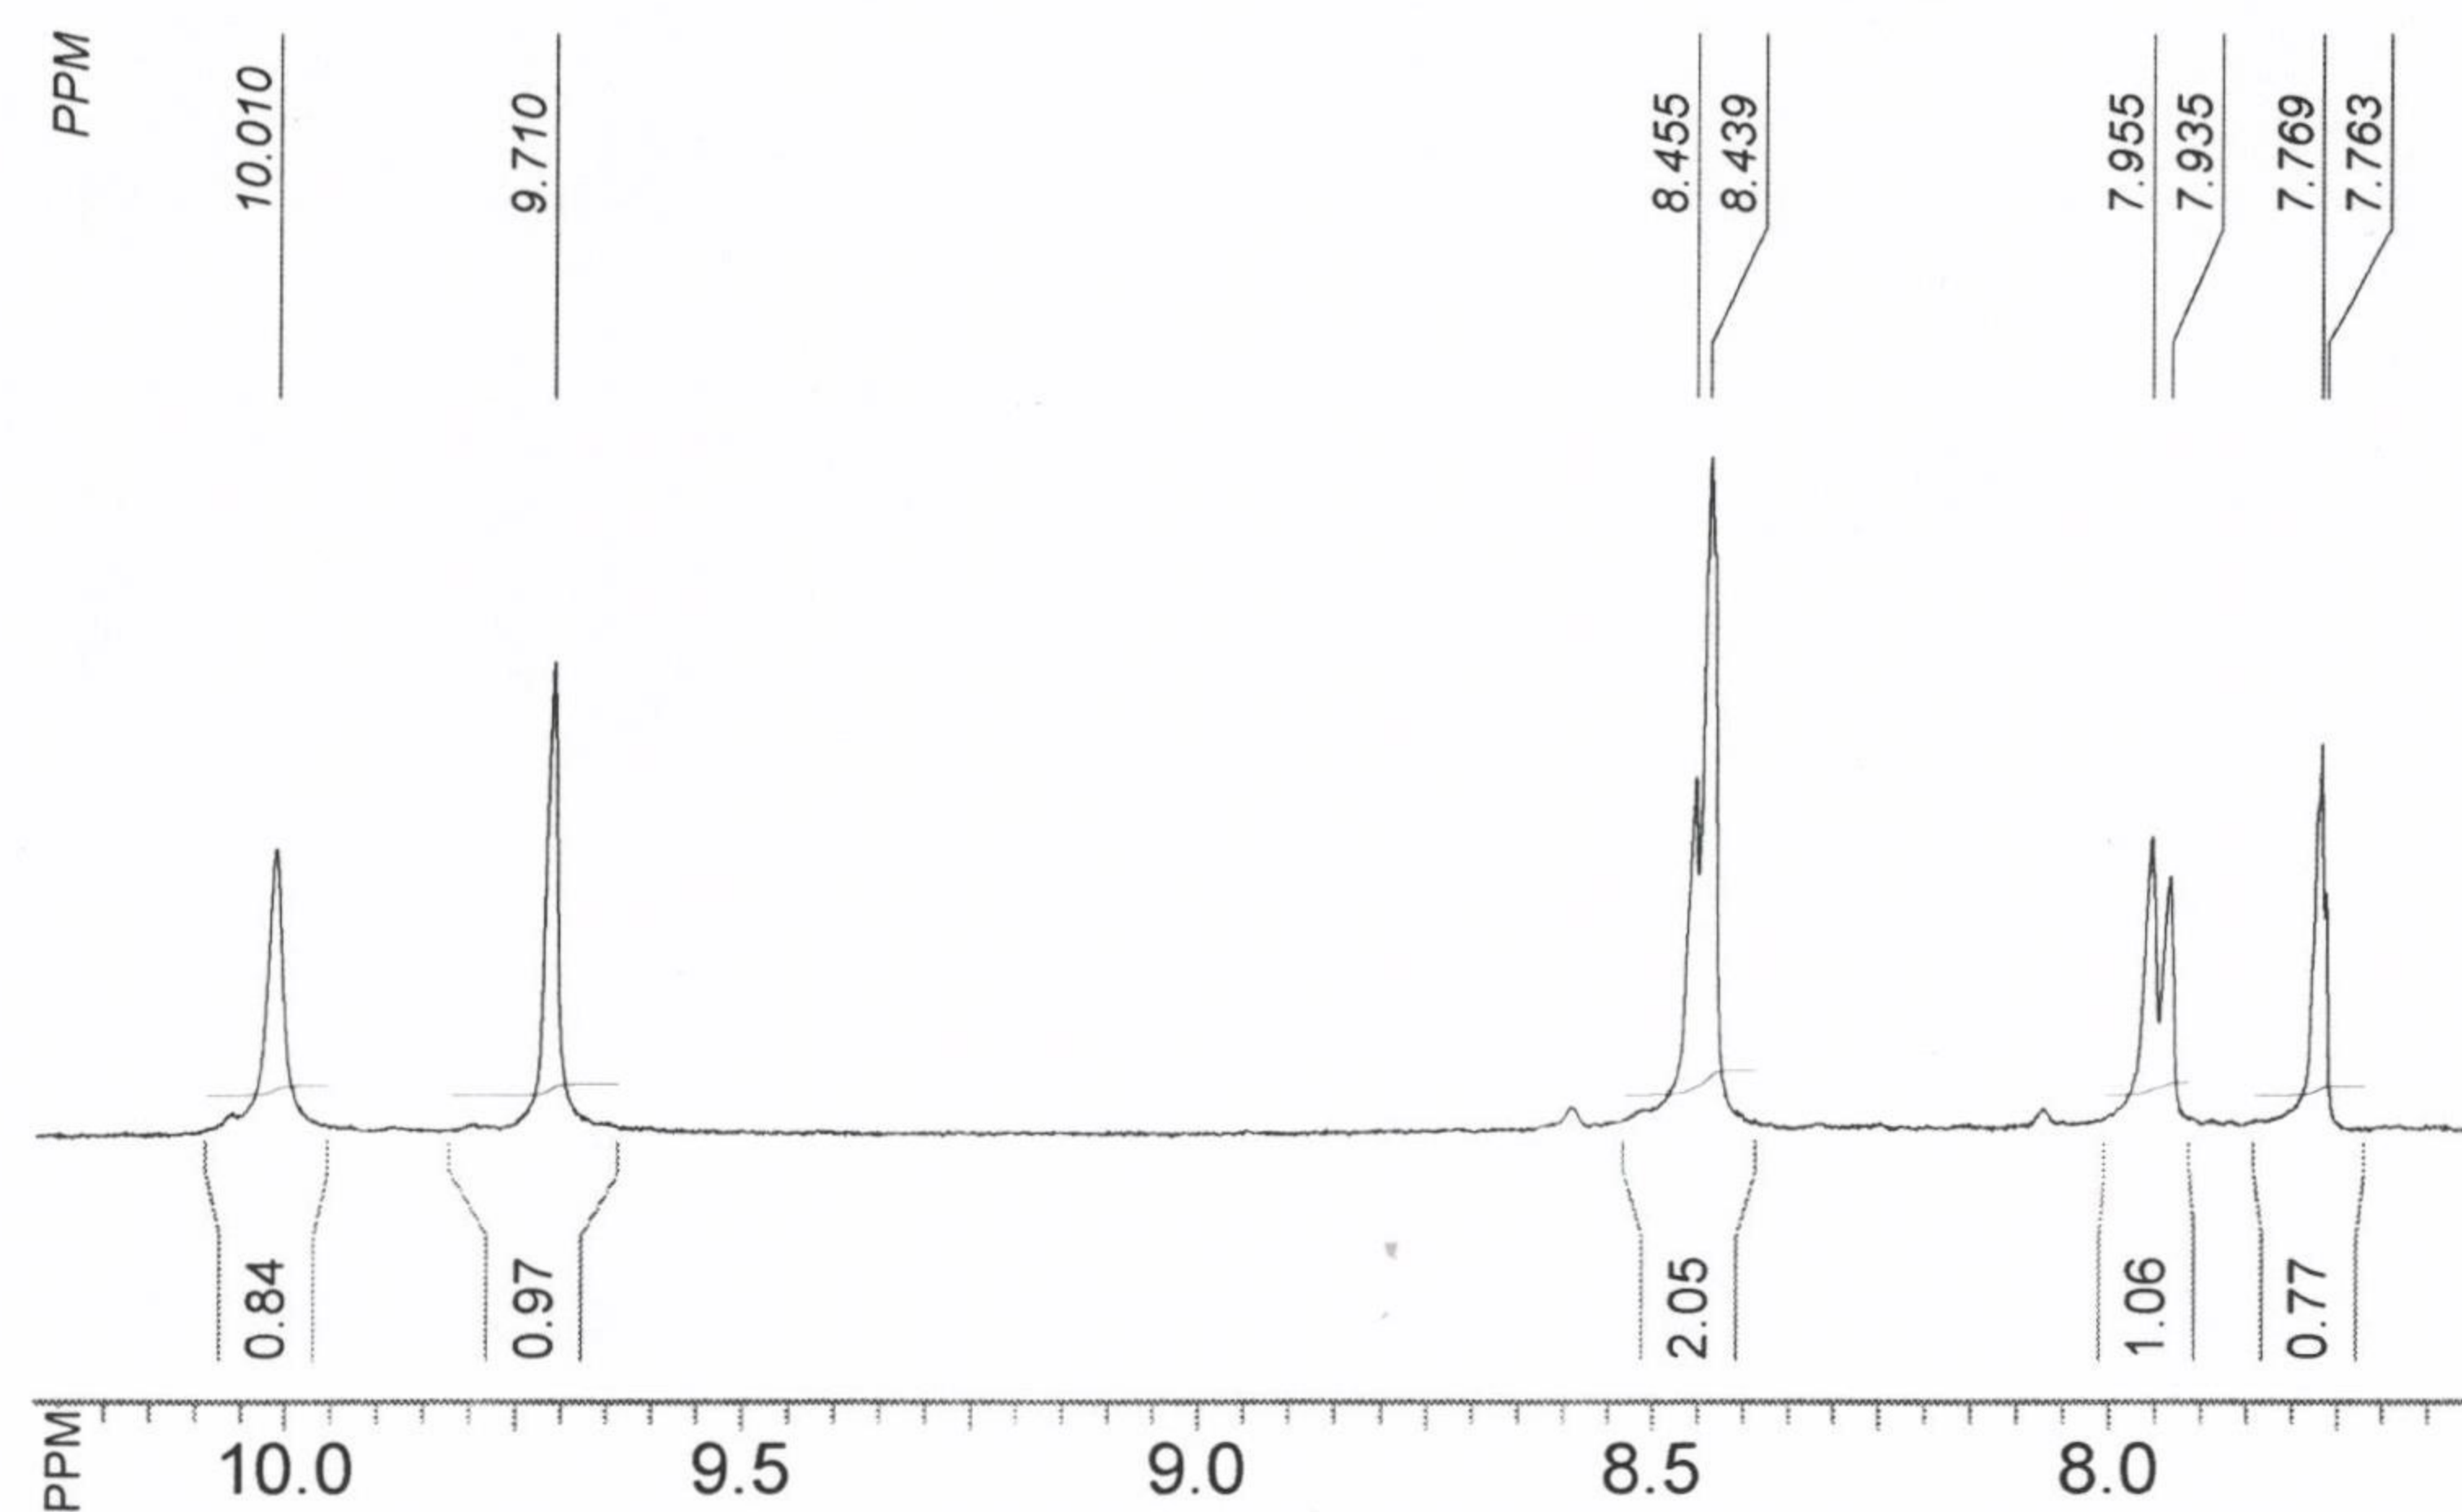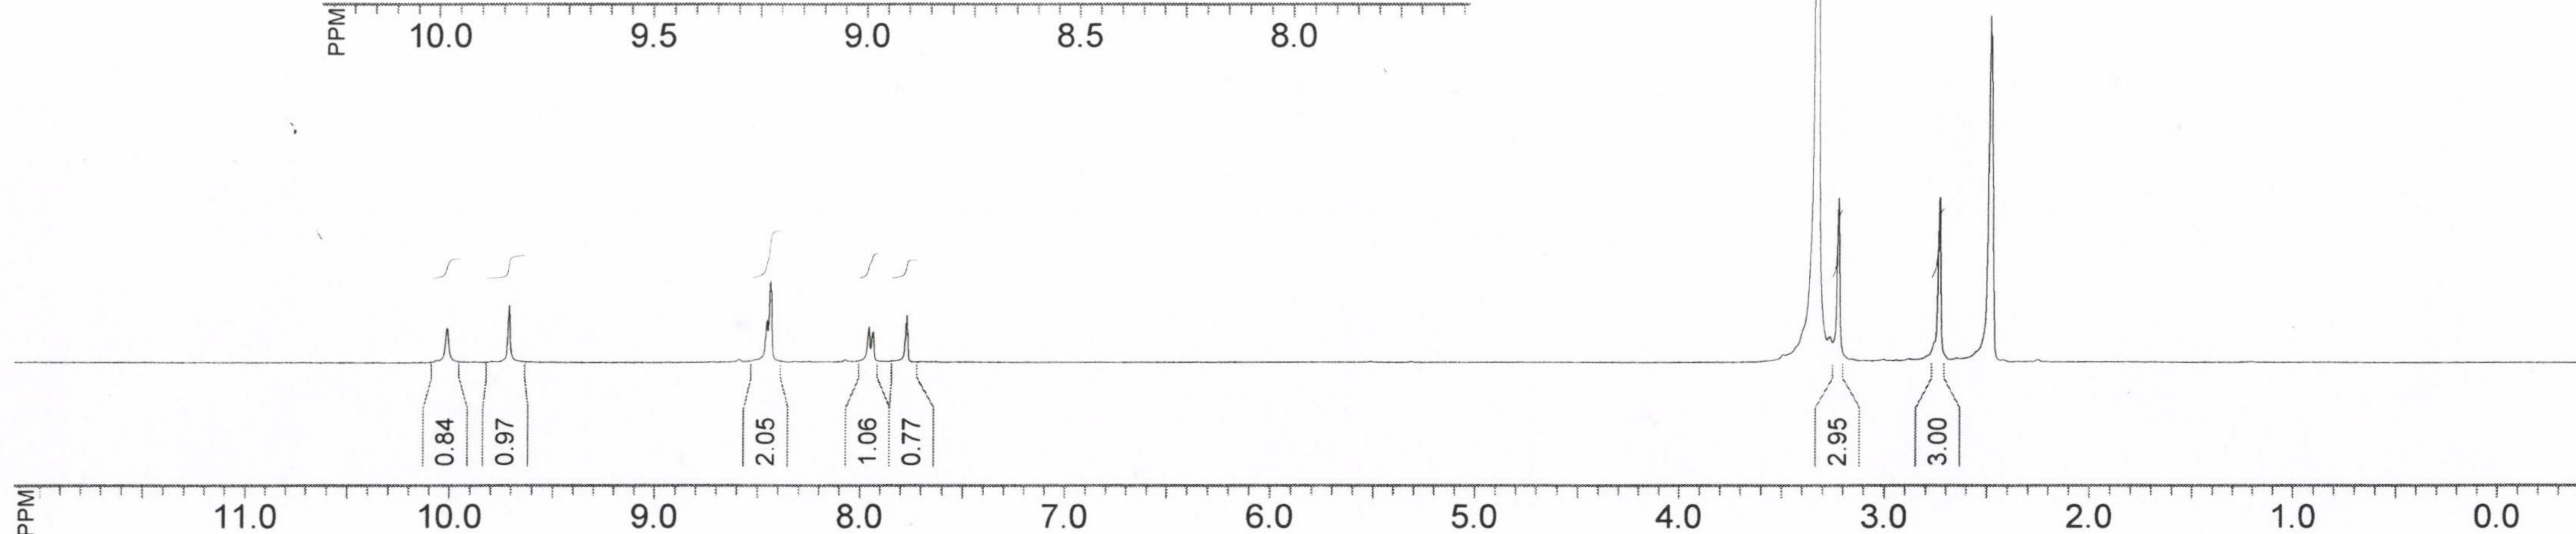

File name: skv-12-24072018-SO3Na.fid

Operator:

SF: 299.9530 MHz

NSC: 0

PW: 7.00 usec, RG: 20

SI: 32768

Date: 24-Jul-2018

Solvent: DMSO

SW: 4500 Hz

TE: 300 K

AQ: 2.00 sec, RD: 0.00 sec

STANDARD 1H OBSERVE



PPM

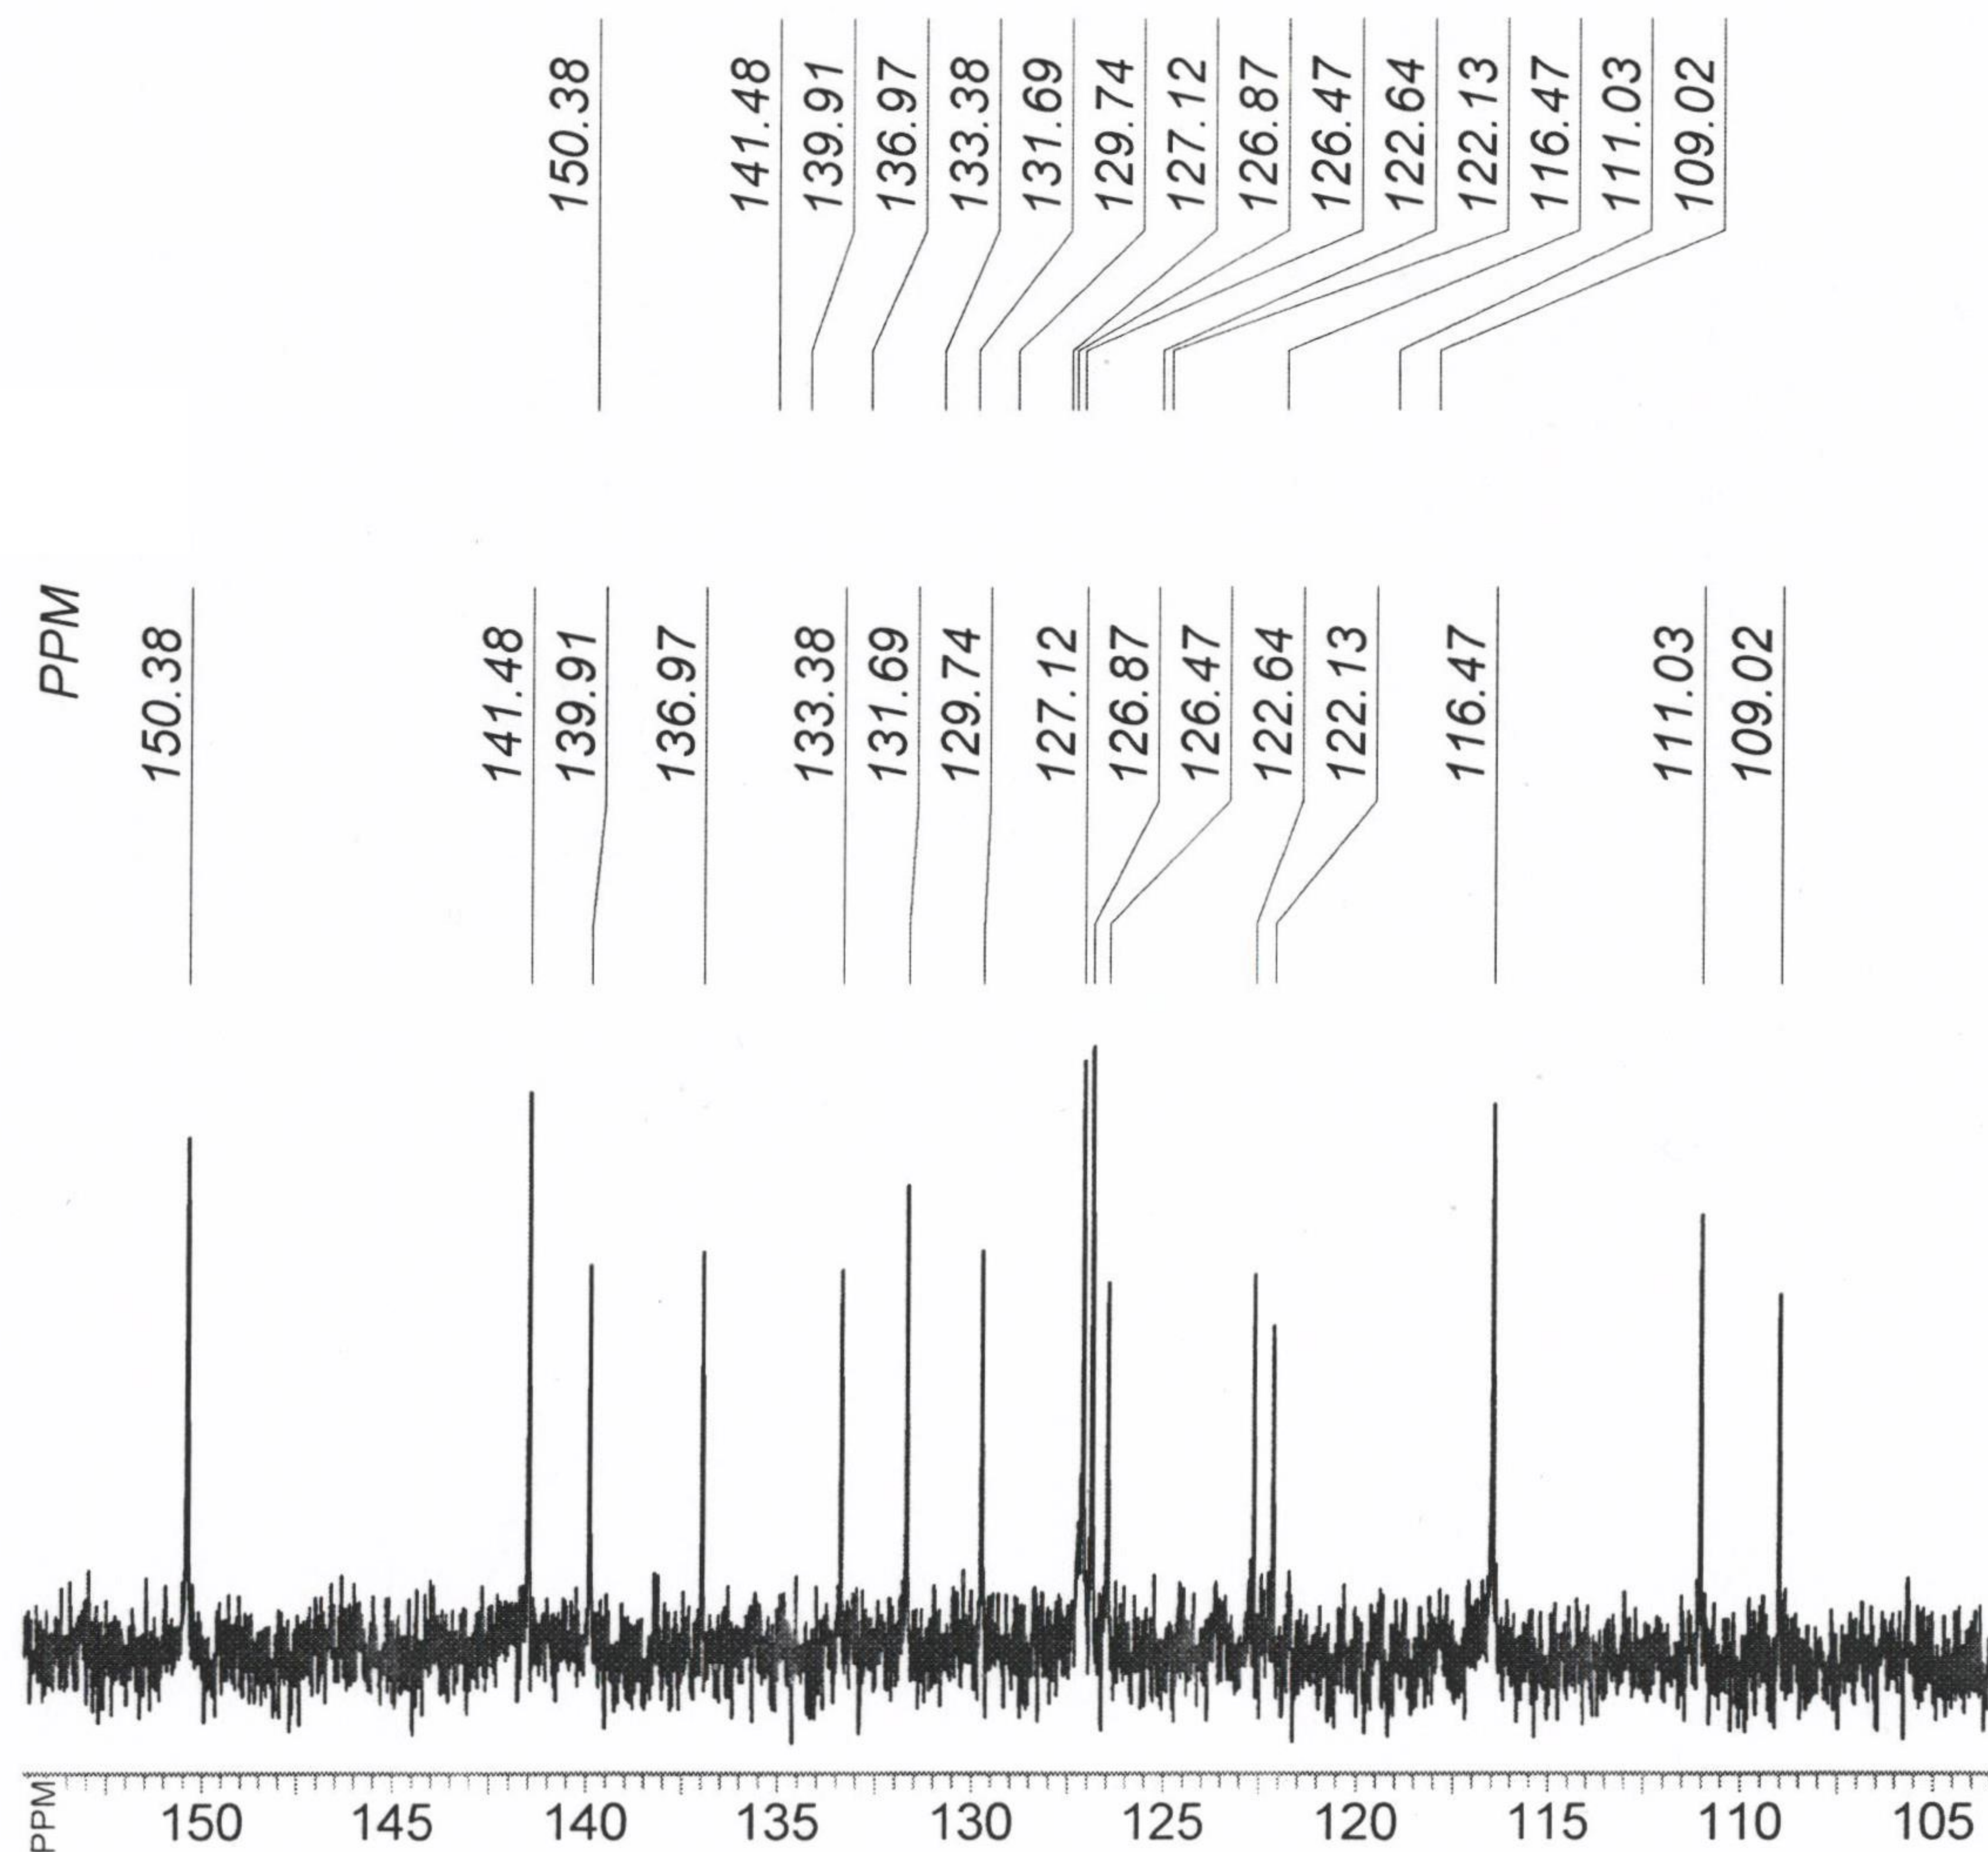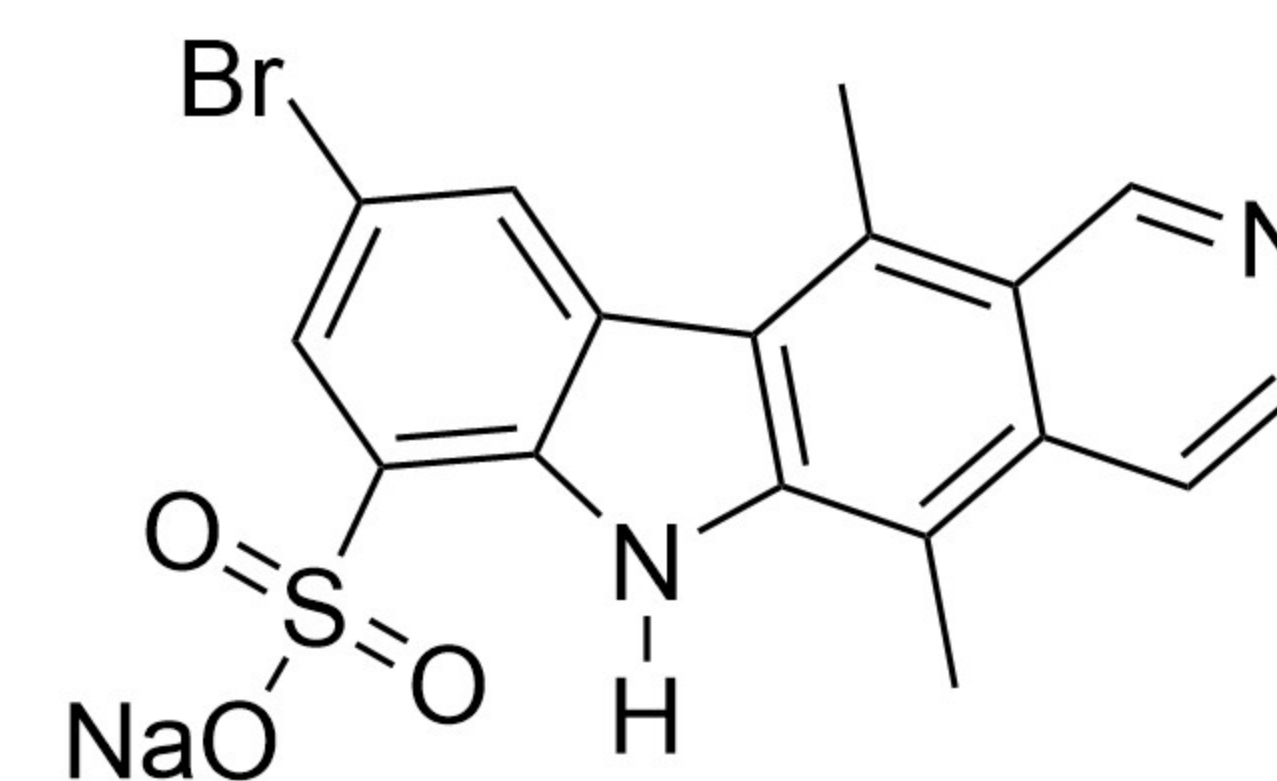

14.73

12.06

PPM

180 170 160 150 140 130 120 110 100 90 80 70 60 50 40 30 20 10

File name: phts1117\_C13

Operator: root

SF: 125.6934 MHz

NSC: 474

PW: 0.00 usec, RG: 51200

SI: 65536

Date: 07-Jun-2018

Solvent: DMSO

SW: 32680 Hz

TE: 683 K

AQ: 1.57 sec, RD: 0.00 sec
